## RESEARCH REPORT

# The OsJAZ1 degron modulates jasmonate signaling sensitivity during rice development

Jiaqi Tian<sup>1</sup>, Lichun Cao<sup>1</sup>, Xiaofei Chen<sup>1</sup>, Mingjiao Chen<sup>1</sup>, Peng Zhang<sup>1</sup>, Liming Cao<sup>2</sup>, Staffan Persson<sup>1,3</sup>, Dabing Zhang<sup>1,4,5</sup> and Zheng Yuan<sup>1,4,\*</sup>

## ABSTRACT

Jasmonates (JAs) are crucial to the coordination of plant stress responses and development. JA signaling depends on JASMONATE-ZIM DOMAIN (JAZ) proteins that are destroyed by the SCF<sup>COI1</sup>-mediated 26S proteasome when the JAZ co-receptor COI1 binds active JA or the JA-mimicking phytotoxin coronatine (COR). JAZ degradation releases JAZ-interacting transcription factors that can execute stress and growth responses. The JAZ proteins typically contain Jas motifs that undergo conformational changes during JA signal transduction and that are important for the JAZ-COI1 interaction and JAZ protein degradation. However, how alterations in the Jas motif and, in particular, the JAZ degron part of the motif, influence protein stability and plant development have not been well explored. To clarify this issue, we performed bioassays and genetic experiments to uncover the function of the OsJAZ1 degron in rice JA signaling. We found that substitution or deletion of core segments of the degron altered the OsJAZ1-OsCOI1b interaction in a COR-dependent manner. We show that these altered interactions function as a regulator for JA signaling during flower and root development. Our study therefore expands our understanding of how the JAZ degron functions, and provides the means to change the sensitivity and specificity of JA signaling in rice.

**KEY WORDS:** Jasmonates, OsJAZ1, Degron, Sensitivity, Flower, *Oryza sativa*

## INTRODUCTION

Jasmonates (JAs) are oxylipin phytohormones that are crucial to the coordination of plant stress responses and development. How JA specifically regulates different environmental and/or developmental cues, and manages to modulate multiple signaling outputs in specific cell types or organs, is however not well understood. Studies in the model eudicot plant *Arabidopsis* have revealed that the central JA signaling pathway is composed of CORONATINE INSENSITIVE1

(COI1)-JASMONATE-ZIM DOMAIN (JAZ) co-receptors, JAZ-interacting transcription factors (TFs) and other regulatory modules that balance JA signaling input and output responses (Browse, 2009; Howe et al., 2018; Westernack and Hause, 2013). This signaling cascade appears to be conserved in land plants (Chini et al., 2016; Han, 2017; Howe et al., 2018; Monte et al., 2018). Upon JA binding, the JAZ proteins are destroyed by SKP1-CUL1-F-box protein (SCF)<sup>COI1</sup>-mediated 26S proteasome, which releases JAZ-interacting TFs, such as MYC and MYB family members, and other TFs, to drive gene expression and thus change growth responses (Chico et al., 2008; Howe et al., 2018; Pauwels and Goossens, 2011; Wager and Browse, 2012). Hence, changes to JAZ protein stability and/or protein variants affect plant development (Cai et al., 2014; Chini et al., 2007; Chung et al., 2010; Chung and Howe, 2009; Gimenez-Ibanez et al., 2017; Hori et al., 2014; Hu et al., 2016; Huang et al., 2017; Oh et al., 2013; Song et al., 2011; Thines et al., 2007; Thireault et al., 2015; Yang et al., 2012; Yu et al., 2016; Zhai et al., 2015).

In the *Arabidopsis* genome, there are 12 JAZ genes belonging to the family of TIFY proteins, which are characterized by two conserved motifs (Chini et al., 2016; Howe et al., 2018; Pauwels and Goossens, 2011): a TIF[F/Y]XG motif [also called the zinc-finger protein expressed in the inflorescence meristem (ZIM) motif] in the central portion of the protein (Pauwels et al., 2010; Thireault et al., 2015); and a JA-associated (Jas) motif that is particularly important for controlling SCF<sup>COI1</sup>-dependent stability, TF interactions and nuclear localization of the JAZ proteins (Chini et al., 2007; Howe, 2018; Melotto et al., 2008; Sheard et al., 2010; Thines et al., 2007; Withers et al., 2012; Yan et al., 2007). Some JAZ proteins also contain cryptic MYC-interaction domain/N-terminal (CMID/NT) motifs that are involved in interactions with other proteins (Goossens et al., 2015; Hou et al., 2010; Moreno et al., 2013; Zhai et al., 2015; Zhang et al., 2017), and ethylene-responsive element binding factor-associated amphiphilic repression (EAR) motifs that repress TF activity (Shyu et al., 2012).

Bioassays and structural studies in *Arabidopsis* have revealed that the Jas motif undergoes pronounced conformational changes during JA signal transduction. In the absence of JA, the Jas motif is in an  $\alpha$ -helical state, which blocks interactions between MYC TFs and the transcriptional Mediator complex subunit MED25 (Cerrudo et al., 2012; Chen et al., 2012; Zhang et al., 2015). As a consequence, the expression of JA responsive genes is blocked. In the presence of active JA [(3R,7S)-jasmonoyl-L-isoleucine; JA-Ile], the N-terminal part of the Jas domain, also named the JAZ degron, undergoes conformational changes to form a bipartite structure which consists of a loop and an amphipathic  $\alpha$ -helix. The loop structure interacts with JA-Ile, whereas the  $\alpha$ -helix mediates docking of the JAZ protein to COI1, which leads to ubiquitylation of JAZ by the 26S proteasome (Sheard et al., 2010). Consequently, the JAZ degradation allows MYC2 to interact with MED25, which activates the expression of MYC2 target genes (An et al., 2017).

<sup>1</sup>Joint International Research Laboratory of Metabolic & Developmental Sciences, Shanghai Jiao Tong University–University of Adelaide Joint Centre for Agriculture and Health, State Key Laboratory of Hybrid Rice, School of Life Sciences and Biotechnology, Shanghai Jiao Tong University, Shanghai 200240, China. <sup>2</sup>Crop Breeding & Cultivation Research Institute, Shanghai Academy of Agriculture Sciences, Shanghai 201403, China. <sup>3</sup>School of Biosciences, University of Melbourne, Parkville, Melbourne, VIC 3010, Australia. <sup>4</sup>Key Laboratory of Crop Marker-Assisted Breeding of Huaian Municipality, Jiangsu Collaborative Innovation Center of Regional Modern Agriculture and Environmental Protection, Huaian 223300, China. <sup>5</sup>School of Agriculture, Food and Wine, University of Adelaide, Waite Campus, Urrbrae, South Australia 5064, Australia.

\*Author for correspondence (zyuan@sjtu.edu.cn)

© J.T., 0000-0003-2890-2412; Lichun Cao, 0000-0001-7371-3448; X.C., 0000-0002-3237-319X; M.C., 0000-0002-9079-5980; P.Z., 0000-0001-6064-7146; Liming Cao, 0000-0001-5315-9224; D.Z., 0000-0003-3181-9812; Z.Y., 0000-0003-1254-0410

Changes to the JAZ degnon sequence impact JA signal transduction (Chini et al., 2007; Melotto et al., 2008; Sheard et al., 2010; Shyu et al., 2012; Thines et al., 2007; Zhang et al., 2015). In most cases this leads to abolished JA signaling, but different splice variants or divergences in the Jas motif, for example those of *Arabidopsis* JAZ10, JAZ2, JAZ7, JAZ8 and JAZ13, might also stabilize their repressor activity (Chung et al., 2010; Chung and Howe, 2009; Melotto et al., 2008; Moreno et al., 2013; Shyu et al., 2012; Thireault et al., 2015; Yan et al., 2014).

Rice contains conserved JA biosynthesis and signaling pathways (Cai et al., 2014; Yuan and Zhang, 2015). In the *osjaz1/extra glumes (eg) 2-1D* dominant mutant, a substitution of Ala<sup>5</sup> (A<sup>5</sup>) by Gly<sup>5</sup> (G<sup>5</sup>) was identified in the OsJAZ1 degnon (DLPIA<sup>5</sup>RR changed to DLPIG<sup>5</sup>RR), which blocked interaction between EG2-1D and OsCOI1b and, in turn, repressed E class MADS-box TF genes, such as *OsMADS1*, which resulted in the delayed transition of spikelet meristem to floral meristem (Cai et al., 2014). In addition, overexpression of mutated OsJAZ proteins (mJAZ with R<sup>6</sup>R<sup>7</sup> or R<sup>6</sup>K<sup>7</sup> substitution by A<sup>6</sup>A<sup>7</sup>) also affected spikelet meristem identity and determinacy (Hori et al., 2014), which indicates that OsJAZ degnons play similar roles to those of *Arabidopsis* JAZ degnons in shaping OsJAZ-OsCOI1b co-receptor interactions to implement JA-steered responses. But, the abnormal spikelet development was more severe in the overexpression of mJAZ lines than that seen in the *osjaz1/eg2-1D* mutant (Hori et al., 2014), which suggests that

the mJAZ degnon (XXPXAAA; X is any amino acid) might be more stable or insensitive to OsCOI1-dependent protein degradation than that of the EG2-1D degnon (DLPIGRR). To clarify this finding, we investigated how changes to the OsJAZ degnon in OsJAZ1 affected its ability to interact with COI and MYC proteins, and how these changes impacted rice development.

## RESULTS AND DISCUSSION

To dissect the biochemical activity of the OsJAZ degnon, we first compared sequences among the OsJAZ family proteins (Fig. S1). Similar to that of *Arabidopsis*, rice OsJAZ proteins contain several semi-conserved motifs, including CMID/NT, ZIM, Jas and EAR motifs (Fig. 1A and Fig. S1). Among the 15 OsJAZ proteins (Ye et al., 2009), 13 contained conserved or semi-conserved Jas motifs (Fig. 1A), composed of 27 amino acid segments that comprised the canonical JAZ degnon (X<sub>2</sub>PXARR/KX), a core sequence (SLX<sub>2</sub>FX<sub>2</sub>KRX<sub>2</sub>R) and a C-terminal motif (X<sub>5</sub>PY) (Fig. 1B). A conserved Jas intron sequence between the core sequence and the C-terminal X<sub>5</sub>PY motif was present in many of the OsJAZ proteins in proximity to the Jas motif (Fig. 1A), which typically is conserved across different plant species (Chung et al., 2010). The Jas motifs were present in all OsJAZ proteins, but some contained divergent Jas motifs, which might confer plasticity (Shyu et al., 2012) or specificity for their interactions with the different OsCOI isoforms (Lee et al., 2013).

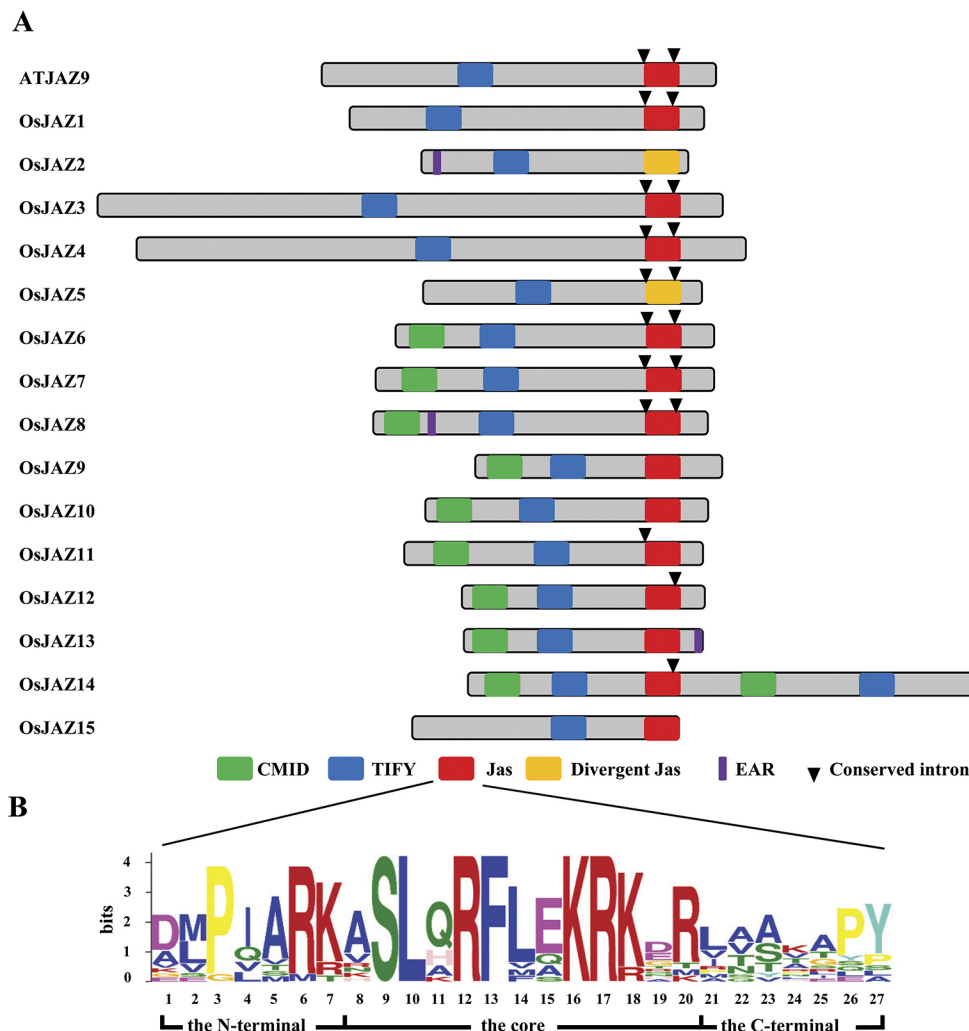

**Fig. 1. Motif analysis of the rice OsJAZ protein family.** (A) Diagrams show conserved motifs in the OsJAZ protein family. The positions of conserved functional domains are depicted by colored boxes. Arrowheads indicate conserved intron positions that flank the Jas motif in the DNA sequence. (B) Residue composition of consensus sequence in the Jas motif. Amino acids are color coded according to their properties, and the size indicates frequency.

To explore how changes in the Jas motif affect the interactions between OsJAZ1, OsCOI1b and OsMYC2, we made series of amino acid deletions or substitutions in the Jas motif of OsJAZ1 and tested how this impacted the interactions in yeast two-hybrid assays (Fig. 2A). As expected, the interaction between OsJAZ1 and OsCOI1b was dependent on coronatine (COR; a structural mimic of JA-Ile). Deletion of the degron sequence (OsJAZ1<sup>jasD1-8</sup>) abolished the interaction between OsJAZ1 and OsCOI1b, but did not affect the ability of it to interact with OsMYC2 (Fig. 2A). Furthermore, deletions of A<sup>5</sup>, R<sup>6</sup>, A<sup>5</sup>R<sup>6</sup>R<sup>7</sup> and I<sup>4</sup>A<sup>5</sup>R<sup>6</sup> in OsJAZ1 impaired its interactions with OsCOI1b, similar to when the R<sup>6</sup>R<sup>7</sup> were substituted by A<sup>6</sup>A<sup>7</sup> in OsJAZ1 (Fig. 2A). These data corroborate that the OsJAZ1 degron has a conserved role in the COR-dependent OsJAZ1-OsCOI1b interaction. Nevertheless, deletion of the first four amino acids in the degron (OsJAZ1<sup>jasD1-4</sup>), or deletion of I<sup>4</sup>A<sup>5</sup> and A<sup>5</sup>R<sup>6</sup> did not affect its ability to interact with OsCOI1b and OsMYC2 in yeast (Fig. 2A). These results suggest that certain regions of JAZ1 might not be needed for the interactions to take place and highlights issues surrounding why these residues have been maintained in JAZ1. Perhaps these additional amino acids of the degrons provide

some form of flexibility, plasticity or even specificity for JAZ interactions with different COI isoforms (Lee et al., 2013). It is also possible that some of the deletions could confer conformational changes to OsJAZ1. Protein structure studies revealed that the degron could change its conformation from an  $\alpha$ -helix to a loop when active JA was presented (Zhang et al., 2015). This indicates that the interactions between OsJAZ1 and OsCOI1b might be tolerant to certain changes, as the deletions of D<sup>1</sup>L<sup>2</sup>P<sup>3</sup>I<sup>4</sup>, I<sup>4</sup>A<sup>5</sup> and A<sup>5</sup>R<sup>6</sup> in OsJAZ1 can still maintain interactions with OsCOI1b.

Apart from the degron length and conformation, research in *Arabidopsis* found that the interaction between AtJAZs and AtCOI1 depends on different COR concentrations (Melotto et al., 2008), e.g. different COR concentrations were needed for interactions to occur between AtCOI1 and alternatively spliced AtJAZ10 and AtJAZ2 isoforms (Chung et al., 2010; Chung and Howe, 2009). Indeed, the interaction strength differs between OsCOI1b and OsJAZ1<sup>jas</sup> compared with several other OsJAZ1 mutations (Fig. 2). For example, OsCOI1b could interact with both EG2-1D and OsJAZ1<sup>jasDA5</sup> under 50  $\mu$ M and 100  $\mu$ M COR, respectively (Fig. 2B). To further explore how COR concentrations affected

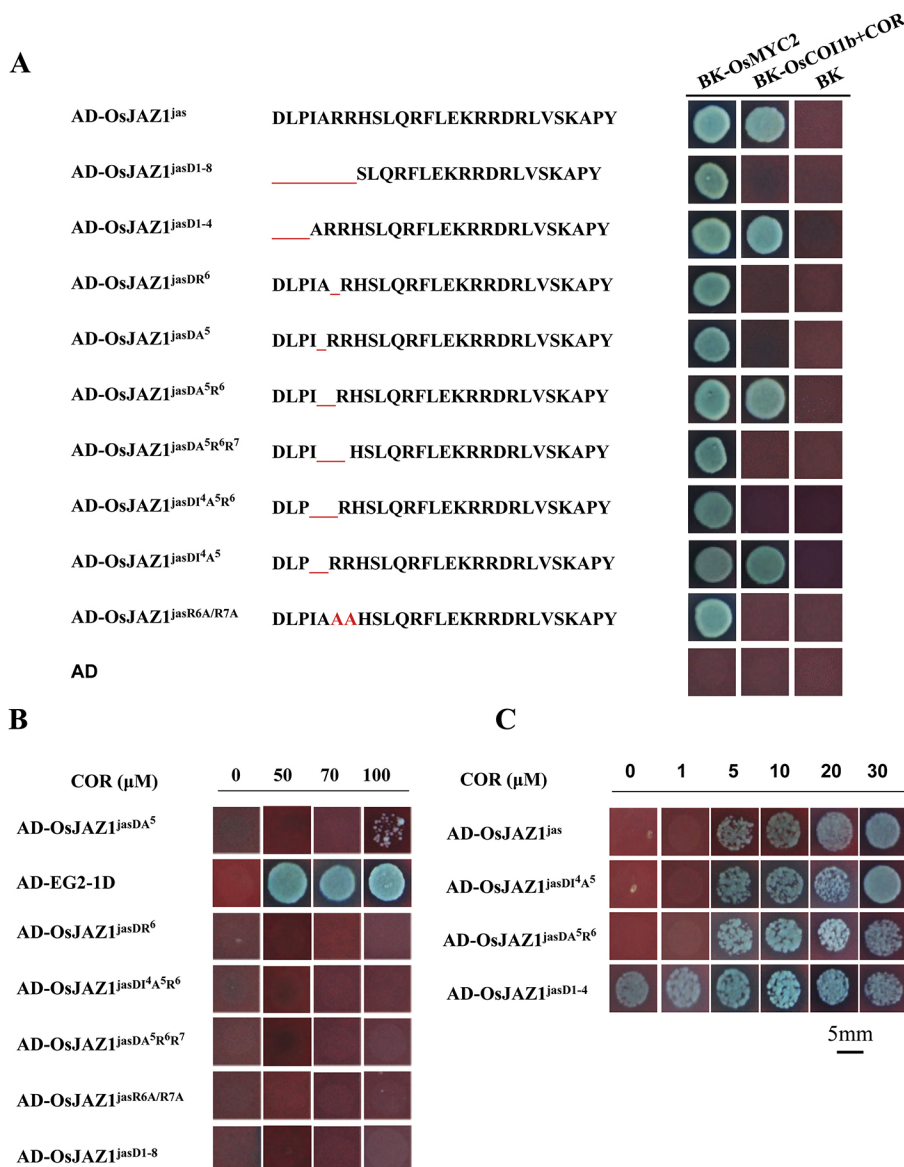

**Fig. 2. COR-dependent OsJAZ1-COI1b interactions are determined by the degron domain.** (A) The amino acid sequences of wild type (OsJAZ1<sup>jas</sup>) and different OsJAZ1 variants. Deletion or substitution residues are underlined or in red, respectively. Yeast two-hybrid assays were applied to assess interactions between OsJAZ1 variants and OsCOI1b or OsMYC2. To detect the OsCOI1b-OsJAZ1 interactions, transformed yeast cells were grown on SD-Trp/-Leu/-His/-Ade/X- $\alpha$ -Gal medium that contained 30  $\mu$ M COR. To detect the OsMYC2-OsJAZ1 variant interactions, transformed yeast cells were grown on SD-Trp/-Leu/-His/-Ade/X- $\alpha$ -Gal medium. AD, pGADT7; BK, pGBKT7. (B,C) Dose-dependent interactions were detected between OsCOI1b and different OsJAZ1 variants in the presence of different concentrations of COR.



the interactions between OsCOI1b and different mutations of OsJAZ1, we tested the mutated OsJAZ1 versions that interacted with OsCOI1b under intermediate (30  $\mu$ M) COR concentrations (Fig. 2A), i.e. OsJAZ1<sup>DI4A5</sup>, OsJAZ1<sup>jasDA5R6</sup> and OsJAZ1<sup>jasDI1-4</sup>, against OsCOI1b under lower (0 to 30  $\mu$ M) COR concentrations. Although the interactions between OsCOI1b and OsJAZ1<sup>jasDI4A5</sup>/OsJAZ1<sup>jasDA5R6</sup> were similar to OsJAZ1<sup>jas</sup>, the interaction between OsCOI1b and OsJAZ1<sup>jasDI1-4</sup> was COR independent (Fig. 2C). In summary, these results suggested that degon sequence variants do play important roles in conferring COR sensitivity to JAZ-COI1b interactions, similar to the interaction between TIR1 and Aux/IAA (Calderón Villalobos et al., 2012). By contrast, we found that truncated Jas motifs after the core sequence did not affect the interactions between OsJAZ1, OsCOI1b and OsMYC2. Nevertheless, R<sup>12</sup>, L<sup>14</sup> and R<sup>17</sup> substitution in OsJAZ1 affected the interaction between OsJAZ1 and OsMYC2, and F<sup>13</sup> to A<sup>13</sup>

substitution in the core sequence abolished the interaction between OsJAZ1 and OsMYC2 or OsCOI1b (Fig. S2). These interaction relationships between OsJAZ1 and OsMYC2 are inconsistent with structural estimates of AtJAZ9 (Zhang et al., 2015), which suggests that interaction between OsJAZ variants and OsMYC2 might be sequence specific. However, reminiscent of studies of AtJAZ1 (Sheard et al., 2010), our data provide important evidence for how the core sequence of OsJAZ1 impacts interactions between OsJAZ1, OsCOI1b and OsMYC2.

Although bioassay and protein structure studies of JAZ3/9 in *Arabidopsis* indicate that the Jas degon sequence is pivotal for JA signaling, few studies have investigated how the sequence contributes to plant growth and development (e.g. Cai et al., 2014). We therefore applied a CRISPR-Cas9 system to edit the OsJAZ1 degon sequence (Xie et al., 2015), and established deletion and substitution lines within the degon (Fig. 3A). We

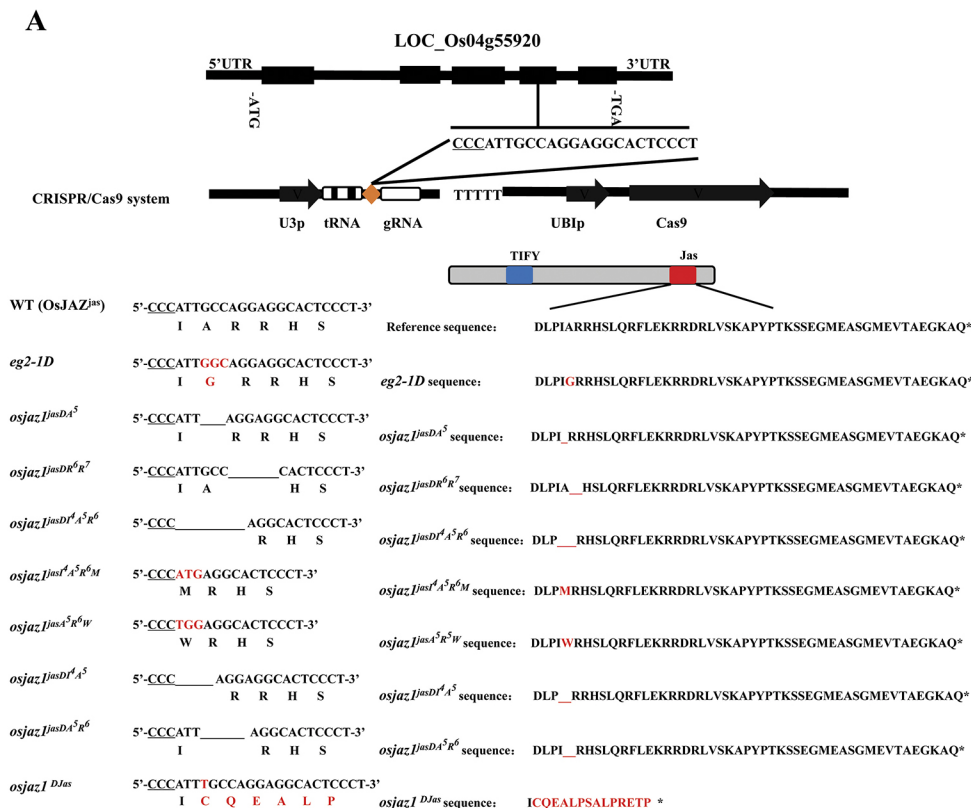

**Fig. 3. CRISPR-Cas9 targeted editing of the degon domain leads to specific changes in spikelet development.**

(A) CRISPR/Cas9 editing of *OsJAZ1* in rice. Construct illustration of CRISPR/Cas9 systems for targeted editing of the *OsJAZ1* gene in rice. Deletion or substitution residues are underlined or in red, respectively. The sequence of lines *osjaz1*<sup>Djas</sup> has a nucleotide insertion in target sequence. The sequences of lines *osjaz1*<sup>jasDA5</sup>, *osjaz1*<sup>jasDA5R6</sup>, *osjaz1*<sup>jasDI4A5</sup>, *osjaz1*<sup>jasDR6R7</sup> and *osjaz1*<sup>jasDI4A5R6</sup> have a 3 nt, 6 nt, 6 nt, 6 nt or 9 nt deletion, respectively, in the target sequence. The sequences of lines *osjaz1*<sup>jasI4A5R6M</sup> and *osjaz1*<sup>jasA5R6W</sup> have three and two nucleotides replaced by ATG and TGG, respectively. (B) Floral organ phenotypes of different *OsJAZ1* CRISPR/Cas9 lines. Arrowheads indicate lemma-like structure. le, lemma; pa, palea; sl, sterile lemma. Scale bars: 1 mm.

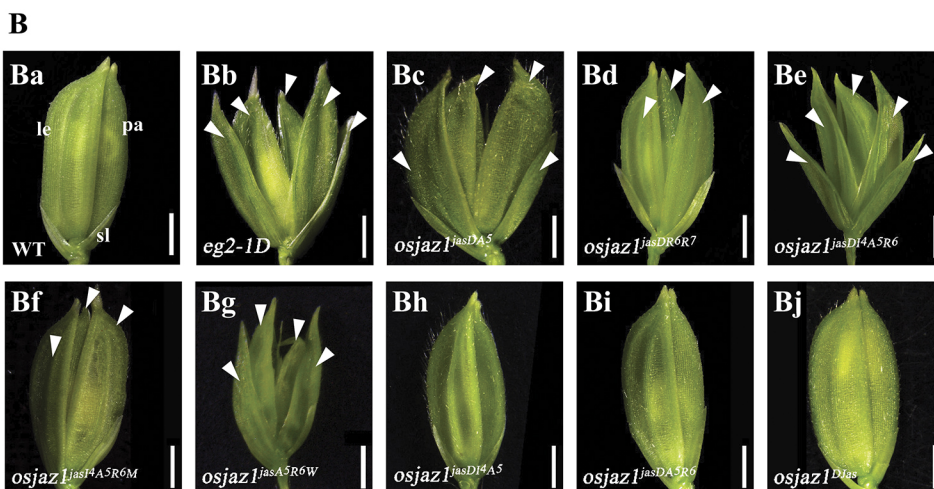

analyzed these lines for developmental phenotypes that deviated from the wild type. Consistent with our yeast data, the single  $A^5$  deletion lines, as well as those lines with  $R^6R^7$  and  $I^4A^5R^6$  deletions, and substitutions of  $I^4A^5R^6$  with M and  $A^5R^6$  with W, were dominant and grew abnormal spikelets (Fig. 3A,B). These mutant phenotypes mimic those of *osjaz1/eg2-1D*, a dominant negative *osjaz1* mutant, which have extra lemma-like organs outside the lemma and palea, and reverted the lodicule to glume-like organs in the spikelets (Fig. 3A,B). These data confirmed that certain degron mutants impaired JA signaling during rice reproductive development. By contrast, the  $I^4A^5$  and  $A^5R^6$  deletion lines grew wild type-like spikelets (Fig. 3Bi and Bj), indicating that  $I^4A^5$  and  $A^5R^6$  deletions did not affect JA response to a degree that affected reproductive development in our growth conditions. The Jas domain deletion mutant (resulting in a truncated OsJAZ1) produced spikelets similar to wild type (Fig. 3Ba and Bj), which indicates functional redundancies among OsJAZ proteins, similar to that of AtJAZ proteins (Campos et al., 2016). These data are consistent with the Y2H data, and corroborate that degron modifications affect JA signal transduction. Indeed, the variants that abolished OsJAZ1-OsCOI1b interactions affected rice flower development by delaying the transition from spikelet meristem to floral meristem, mimicking phenotypes of *eg2-1D* (Cai et al., 2014).

Apart from floral development, JAs also affect root elongation (Cai et al., 2014; Wasternack and Hause, 2013), a process in which it is substantially easier to measure the sensitivity of JA signaling by applying methyl (Me)JA treatment. To assess whether the degron mutations affected JA signaling, we therefore observed root growth patterns when plants were grown on media supplemented with 0, 5, 10 and 15  $\mu$ M MeJA. The root length of *egl* (*Arabidopsis DAD1* homolog; a JA biosynthesis mutant) was longer than that of wild-type roots under mock conditions (Fig. 4 and Fig. S3) (Cai et al., 2014). Root growth of all lines was inhibited by MeJA, but the roots of *osjaz1<sup>jasDA5</sup>* plants were significantly longer than those of wild-type, *eg2-1D* and *osjaz1<sup>jasDA5R6</sup>* plants under different MeJA

concentrations (Fig. 4). As expected, *egl* and *osjaz1<sup>jasDA5R6</sup>* roots were of a similar length to wild-type roots under 15  $\mu$ M of MeJA (Fig. 4 and Fig. S3). These data indicate that the *osjaz1<sup>jasDA5</sup>* and *eg2-1D* lines are less sensitive to changes in JA signaling than wild-type, *egl* and *osjaz1<sup>jasDA5R6</sup>* lines, and further corroborate that the degron sequence variation modulates the sensitivity of JA signaling.

Altogether, our experiments provide new understanding on the function of the OsJAZ1 degron in rice JA signaling. We show that sequence variation in the degron of OsJAZ1 affects OsJAZ-OsCOI1b interaction, and possibly influences conformational changes of the OsJAZ1 protein that are needed for efficient signaling (Sheard et al., 2010; Zhang et al., 2015). Furthermore, this study extends our understanding of how the degron variation of OsJAZ1 contributes to complexity, specificity and sensitivity in the JA response.

## MATERIALS AND METHODS

### Yeast two-hybrid assay

For the yeast two-hybrid assay, full-length cDNAs of *OsCOI1b*, *OsMYC2*, *OsJAZ1* and site-directed mutagenesis of *OsJAZ1* were amplified and cloned into pGBKT7 and pGADT7 vectors, respectively (Clontech, primers are listed in Table S1). Site-directed mutagenesis of the Jas domain was performed using the Polymerase Incomplete Primer Extension method (Klock and Lesley, 2008). Mutations for all plasmid constructs were confirmed by Sanger sequencing [Generay Biotech (Shanghai) Co.]. Then, the experiments were carried out following the Matchmaker Gold Yeast Two-Hybrid System manufacturer's instructions (Clontech). Detection of protein-protein interactions between OsCOI1b and OsJAZ1 variants were performed in SD/-Trp/-Leu/-His/-Ade/X- $\alpha$ -Gal agar plates which contained 30  $\mu$ M COR. To prepare 30 mM COR stock solution, 1 mg COR (Sigma-Aldrich, C8115) was dissolved in 1% methanol, which was further diluted to the final concentration with distilled water. Detection of protein-protein interactions between OsMYC2 and OsJAZ1 variants were performed in SD/-Trp/-Leu/-His/-Ade/X- $\alpha$ -Gal agar plates which contained 30 mM of 3-amino-1,2,4-triazole.

### CRISPR/Cas9 construction and rice transformation

For targeted editing of OsJAZ1 degron, the sgRNA (ATTGCCAGGAG-GCACTCCCT) in the fourth exon of the *OsJAZ1* gene was selected for CRISPR/Cas9 construction (Xie et al., 2015). Primers are listed in Table S1. *Agrobacterium*-mediated stable transformation in rice was performed as reported previously (Hiei and Komari, 2008).

### Plant growth conditions and generation of transgenic plants

The variety 9522 (*Oryza sativa* L. ssp. *japonica*) and transgenic plants *osjaz1<sup>jasDA5</sup>*, *osjaz1<sup>jasDR6R7</sup>*, *osjaz1<sup>jasDR6R7</sup>*, *osjaz1<sup>jasI4A5R6M</sup>*, *osjaz1<sup>jasA5R6W</sup>*, *osjaz1<sup>jasDI4A5</sup>*, *osjaz1<sup>jasDA5R6</sup>* and *osjaz1<sup>DJas</sup>* were planted in the paddy fields of Shanghai Jiao Tong University (30°N, 121°E). The seeds of  $T_0$  heterozygous plants and  $T_1$  plants, segregated by self-pollination, were collected and genotyped for analysis. Plants were also grown in Conviron chambers (GR48), in which the parameters were set at 28°C, 14.0 h for long-day conditions and 10.5 h for short-day conditions. The morphology of 150–200 spikelets from panicles of five independent plants or transgenic lines was observed, and plants were photographed using a Leica S8APO stereomicroscope. For the root-sensitivity assay, plants were germinated and treated with 0, 5, 10 and 15  $\mu$ M MeJA for 5 days. The length of root was then calculated from ten independent plants. To prepare MeJA stock solution, 573  $\mu$ l MeJA (Sigma-Aldrich, 392707) was first dissolved in 95% ethanol to 5 ml, and was further diluted with distilled water to 20 mM and saved at 4°C. Data were analyzed using GraphPad Prism 7 software.

### Acknowledgements

The authors are grateful to Prof. Kabing Xie (Huazhong Agricultural University) for the CRISPR/Cas9 vector, and to Prof. Geng Wu (Shanghai Jiao Tong University) for helpful comments and discussion.

### Competing interests

The authors declare no competing or financial interests.

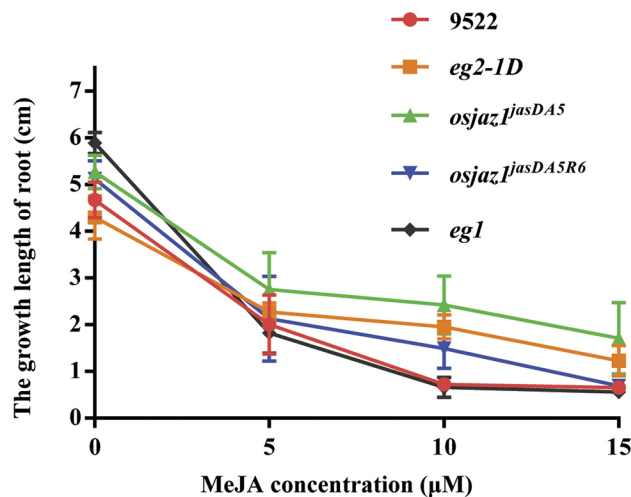

**Fig. 4. OsJAZ1 degron sequence variation affects root growth by modulating the sensitivity of JA signaling.** All seedlings were germinated and grown on 1/2 MS medium or on medium supplemented with 0, 5, 10 or 15  $\mu$ M MeJA. The root lengths were calculated from ten independent plants. Data are mean  $\pm$  s.d. Note that root growth of *osjaz1<sup>jasDA5</sup>* and *eg2-1D* plants was less sensitive to MeJA treatment, compared with that of *osjaz1<sup>jasDA5R6</sup>*, *egl* and wild-type 9522.

## Author contributions

Conceptualization: Z.Y.; Methodology: J.T., Lichun Cao, X.C., Z.Y.; Validation: J.T.; Formal analysis: J.T., Lichun Cao, X.C., M.C., Z.Y.; Investigation: X.C., M.C., Liming Cao; Resources: Lichun Cao, P.Z., Liming Cao, D.Z.; Data curation: J.T.; Writing - original draft: J.T., Z.Y.; Writing - review & editing: S.P., Z.Y.; Supervision: S.P., D.Z., Z.Y.; Project administration: Z.Y.; Funding acquisition: Z.Y.

## Funding

This study was supported by the National Natural Science Foundation of China (31470397, 91417311 and 31671260); National Transgenic Major Program Grants (2016ZX08009-003-007); and China Innovative Research Team, the Ministry of Education of the People's Republic of China, and the Program of Introducing Talents of Discipline to Universities (111 Project, B14016). Z.Y. received the SMC Morningstar Young Scholarship of Shanghai Jiao Tong University. Liming Cao received funding from the Program of Shanghai Technology Research Leader (18XD1424300). S.P. was funded by an Australian Research Council future fellowship grant (FT160100218) and acknowledges a University of Melbourne International Research and Research Training Fund (Research Network and Consortia) grant.

## Supplementary information

Supplementary information available online at

<http://dev.biologists.org/lookup/doi/10.1242/dev.173419.supplemental>

## References

- An, C., Li, L., Zhai, Q., You, Y., Deng, L., Wu, F., Chen, R., Jiang, H., Wang, H., Chen, Q. et al. (2017). Mediator subunit MED25 links the jasmonate receptor to transcriptionally active chromatin. *Proc. Natl Acad. Sci. USA* **114**, E8930-E8939.
- Browse, J. (2009). Jasmonate passes muster: a receptor and targets for the defense hormone. *Annu. Rev. Plant Biol.* **60**, 183-205.
- Cai, Q., Yuan, Z., Chen, M., Yin, C., Luo, Z., Zhao, X., Liang, W., Hu, J. and Zhang, D. (2014). Jasmonic acid regulates spikelet development in rice. *Nat. Commun.* **5**, 3476.
- Calderón Villalobos, L. I. A., Lee, S., De Oliveira, C., Ivetac, A., Brandt, W., Armitage, L., Sheard, L. B., Tan, X., Parry, G., Mao, H. et al. (2012). A combinatorial TIR1/AFB-Aux/IAA co-receptor system for differential sensing of auxin. *Nat. Chem. Biol.* **8**, 477-485.
- Campos, M. L., Yoshida, Y., Major, I. T., de Oliveira Ferreira, D., Weraduwage, S. M., Froehlich, J. E., Johnson, B. F., Kramer, D. M., Jander, G., Sharkey, T. D. et al. (2016). Rewiring of jasmonate and phytochrome B signalling uncouples plant growth-defense tradeoffs. *Nat. Commun.* **7**, 12570.
- Cerrudo, I., Keller, M. M., Cargnel, M. D., Demkura, P. V., de Wit, M., Patitucci, M. S., Pierik, R., Pieterse, C. M. and Ballare, C. L. (2012). Low red/far-red ratios reduce Arabidopsis resistance to Botrytis cinerea and jasmonate responses via a COI1-JAZ10-dependent, salicylic acid-independent mechanism. *Plant Physiol.* **158**, 2042-2052.
- Chen, R., Jiang, H., Li, L., Zhai, Q., Qi, L., Zhou, W., Liu, X., Li, H., Zheng, W., Sun, J. et al. (2012). The Arabidopsis mediator subunit MED25 differentially regulates jasmonate and abscisic acid signaling through interacting with the MYC2 and ABI5 transcription factors. *Plant Cell* **24**, 2898-2916.
- Chico, J. M., Chini, A., Fonseca, S. and Solano, R. (2008). JAZ repressors set the rhythm in jasmonate signalling. *Curr. Opin. Plant Biol.* **11**, 486-494.
- Chini, A., Fonseca, S., Fernández, G., Adie, B., Chico, J. M., Lorenzo, O., García-Casado, G., López-Vidriero, I., Lozano, F. M., Ponce, M. R. et al. (2007). The JAZ family of repressors is the missing link in jasmonate signalling. *Nature* **448**, 666-671.
- Chini, A., Gimenez-Ibanez, S., Goossens, A. and Solano, R. (2016). Redundancy and specificity in jasmonate signalling. *Curr. Opin. Plant Biol.* **33**, 147-156.
- Chung, H. S. and Howe, G. A. (2009). A critical role for the TIFY motif in repression of jasmonate signaling by a stabilized splice variant of the JASMONATE ZIM-domain protein JAZ10 in Arabidopsis. *Plant Cell* **21**, 131-145.
- Chung, H. S., Cooke, T. F., Depew, C. L., Patel, L. C., Ogawa, N., Kobayashi, Y. and Howe, G. A. (2010). Alternative splicing expands the repertoire of dominant JAZ repressors of jasmonate signaling. *Plant J.* **63**, 613-622.
- Gimenez-Ibanez, S., Boter, M., Ortigosa, A., García-Casado, G., Chini, A., Lewsey, M. G., Ecker, J. R., Ntoukakis, V. and Solano, R. (2017). JAZ2 controls stomata dynamics during bacterial invasion. *New Phytol.* **213**, 1378-1392.
- Goossens, J., Swinnen, G., Vanden Bossche, R., Pauwels, L. and Goossens, A. (2015). Change of a conserved amino acid in the MYC2 and MYC3 transcription factors leads to release of JAZ repression and increased activity. *New Phytol.* **206**, 1229-1237.
- Han, G. Z. (2017). Evolution of jasmonate biosynthesis and signaling mechanisms. *J. Exp. Bot.* **68**, 1323-1331.
- Hiei, Y. and Komari, T. (2008). Agrobacterium-mediated transformation of rice using immature embryos or calli induced from mature seed. *Nat. Protoc.* **3**, 824-834.
- Hori, Y., Kurotani, K., Toda, Y., Hattori, T. and Takeda, S. (2014). Overexpression of the JAZ factors with mutated jas domains causes pleiotropic defects in rice spikelet development. *Plant Signal. Behav.* **9**, e970414.
- Hou, X., Lee, L. Y., Xia, K., Yan, Y. and Yu, H. (2010). DELLAs modulate jasmonate signaling via competitive binding to JAZs. *Dev. Cell* **19**, 884-894.
- Howe, G. A. (2018). Plant hormones: metabolic end run to jasmonate. *Nat. Chem. Biol.* **14**, 109-110.
- Howe, G. A., Major, I. T. and Koo, A. J. (2018). Modularity in Jasmonate signaling for multistress resilience. *Annu. Rev. Plant Biol.* **69**, 387-415.
- Hu, H., He, X., Tu, L., Zhu, L., Zhu, S., Ge, Z. and Zhang, X. (2016). GhJAZ2 negatively regulates cotton fiber initiation by interacting with the R2R3-MYB transcription factor GhMYB25-like. *Plant J.* **88**, 921-935.
- Huang, H., Liu, B., Liu, L. and Song, S. (2017). Jasmonate action in plant growth and development. *J. Exp. Bot.* **68**, 1349-1359.
- Klock, H. E. and Lesley, S. A. (2008). The Polymerase Incomplete Primer Extension (PIPE) method applied to high-throughput cloning and site-directed mutagenesis. *Methods Mol. Biol.* **498**, 91.
- Lee, H. Y., Seo, J. S., Cho, J. H., Jung, H., Kim, J. K., Lee, J. S., Rhee, S. and Do Choi, Y. (2013). Oryza sativa COI homologues restore jasmonate signal transduction in Arabidopsis coi1-1 mutants. *PLoS ONE* **8**, e52802.
- Melotto, M., Mecey, C., Niu, Y., Chung, H. S., Katsir, L., Yao, J., Zeng, W., Thines, B., Staswick, P., Browse, J. et al. (2008). A critical role of two positively charged amino acids in the Jas motif of Arabidopsis JAZ proteins in mediating coronatine- and jasmonoyl isoleucine-dependent interactions with the COI1 F-box protein. *Plant J.* **55**, 979-988.
- Monte, I., Ishida, S., Zamarreño, A. M., Hamberg, M., Franco-Zorrilla, J. M., García-Casado, G., Gouhier-Darimont, C., Reymond, P., Takahashi, K., García-Mina, J. M. et al. (2018). Ligand-receptor co-evolution shaped the jasmonate pathway in land plants. *Nat. Chem. Biol.* **14**, 480-488.
- Moreno, J. E., Shyu, C., Campos, M. L., Patel, L. C., Chung, H. S., Yao, J., He, S. Y. and Howe, G. A. (2013). Negative feedback control of jasmonate signaling by an alternative splice variant of JAZ10. *Plant Physiol.* **162**, 1006-1017.
- Oh, Y., Baldwin, I. T. and Galis, I. (2013). A jasmonate ZIM-domain protein NaJAZd regulates floral jasmonic acid levels and counteracts flower abscission in Nicotiana attenuata plants. *PLoS ONE* **8**, e57868.
- Pauwels, L. and Goossens, A. (2011). The JAZ proteins: a crucial interface in the jasmonate signaling cascade. *Plant Cell* **23**, 3089-3100.
- Pauwels, L., Barbero, G. F., Geerinck, J., Tillemans, S., Grunewald, W., Pérez, A. C., Chico, J. M., Bossche, R. V., Sewell, J., Gil, E. et al. (2010). NINJA connects the co-repressor TOPLESS to jasmonate signalling. *Nature* **464**, 788-791.
- Sheard, L. B., Tan, X., Mao, H., Withers, J., Ben-Nissan, G., Hinds, T. R., Kobayashi, Y., Hsu, F. F., Sharon, M., Browse, J. et al. (2010). Jasmonate perception by inositol-phosphate-potentiated COI1-JAZ co-receptor. *Nature* **468**, 400-405.
- Shyu, C., Figueroa, P., Depew, C. L., Cooke, T. F., Sheard, L. B., Moreno, J. E., Katsir, L., Zheng, N., Browse, J. and Howe, G. A. (2012). JAZ8 lacks a canonical degron and has an EAR motif that mediates transcriptional repression of jasmonate responses in Arabidopsis. *Plant Cell* **24**, 536-550.
- Song, S., Qi, T., Huang, H., Ren, Q., Wu, D., Chang, C., Peng, W., Liu, Y., Peng, J. and Xie, D. (2011). The Jasmonate-ZIM domain proteins interact with the R2R3-MYB transcription factors MYB21 and MYB24 to affect Jasmonate-regulated stamen development in Arabidopsis. *Plant Cell* **23**, 1000-1013.
- Thines, B., Katsir, L., Melotto, M., Niu, Y., Mandaokar, A., Liu, G., Nomura, K., He, S. Y., Howe, G. A. and Browse, J. (2007). JAZ repressor proteins are targets of the SCF<sup>COI1</sup> complex during jasmonate signalling. *Nature* **448**, 661-665.
- Thireault, C., Shyu, C., Yoshida, Y., St. Aubin, B., Campos, M. L. and Howe, G. A. (2015). Repression of jasmonate signaling by a non-TIFY JAZ protein in Arabidopsis. *Plant J.* **82**, 669-679.
- Wager, A. and Browse, J. (2012). Social Network: JAZ Protein Interactions Expand Our Knowledge of Jasmonate Signaling. *Front. Plant Sci.* **3**, 41.
- Wasternack, C. and Hause, B. (2013). Jasmonates: biosynthesis, perception, signal transduction and action in plant stress response, growth and development. An update to the 2007 review in Annals of Botany. *Ann. Bot.* **111**, 1021-1058.
- Withers, J., Yao, J., Mecey, C., Howe, G. A., Melotto, M. and He, S. Y. (2012). Transcription factor-dependent nuclear localization of a transcriptional repressor in jasmonate hormone signaling. *Proc. Natl Acad. Sci. USA* **109**, 20148-20153.
- Xie, K., Minkenberg, B. and Yang, Y. (2015). Boosting CRISPR/Cas9 multiplex editing capability with the endogenous tRNA-processing system. *Proc. Natl Acad. Sci. USA* **112**, 3570-3575.
- Yan, Y., Stolz, S., Chetelat, A., Reymond, P., Pagni, M., Dubugnon, L. and Farmer, E. E. (2007). A downstream mediator in the growth repression limb of the jasmonate pathway. *Plant Cell* **19**, 2470-2483.
- Yan, H., Yoo, M. J., Koh, J., Liu, L., Chen, Y., Acikgoz, D., Wang, Q. and Chen, S. (2014). Molecular reprogramming of Arabidopsis in response to perturbation of jasmonate signaling. *J. Proteome Res.* **13**, 5751-5766.
- Yang, D. L., Yao, J., Mei, C. S., Tong, X. H., Zeng, L. J., Li, Q., Xiao, L. T., Sun, T. P., Li, J., Deng, X. W. et al. (2012). Plant hormone jasmonate prioritizes defense over growth by interfering with gibberellin signaling cascade. *Proc. Natl Acad. Sci. USA* **109**, E1192-E1200.
- Ye, H., Du, H., Tang, N., Li, X. and Xiong, L. (2009). Identification and expression profiling analysis of TIFY family genes involved in stress and phytohormone responses in rice. *Plant Mol. Biol.* **71**, 291-305.



- Yu, J., Zhang, Y., Di, C., Zhang, Q., Zhang, K., Wang, C., You, Q., Yan, H., Dai, S. Y., Yuan, J. S. et al. (2016). JAZ7 negatively regulates dark-induced leaf senescence in Arabidopsis. *J. Exp. Bot.* **67**, 751-762.
- Yuan, Z. and Zhang, D. (2015). Roles of jasmonate signalling in plant inflorescence and flower development. *Curr. Opin. Plant Biol.* **27**, 44-51.
- Zhai, Q., Zhang, X., Wu, F., Feng, H., Deng, L., Xu, L., Zhang, M., Wang, Q. and Li, C. (2015). Transcriptional mechanism of jasmonate receptor COI1-mediated delay of flowering time in Arabidopsis. *Plant Cell* **27**, 2814-2828.
- Zhang, F., Yao, J., Ke, J., Zhang, L., Lam, V. Q., Xin, X. F., Zhou, X. E., Chen, J., Brunzelle, J., Griffin, P. R. et al. (2015). Structural basis of JAZ repression of MYC transcription factors in jasmonate signalling. *Nature* **525**, 269-273.
- Zhang, F., Ke, J., Zhang, L., Chen, R., Sugimoto, K., Howe, G. A., Xu, H. E., Zhou, M., He, S. Y. and Melcher, K. (2017). Structural insights into alternative splicing-mediated desensitization of jasmonate signaling. *Proc. Natl Acad. Sci. USA* **114**, 1720-1725.
